# Supplementary material for: Ultrafast photoresponse of vertically oriented TMD films probed in a vertical electrode configuration on Si chips
Source: Royal Society of Chemistry journal article supplement (doi:10.1039/d2na00313a), 2022-01-01
Supplement: d2na00313a1.pdf [file d2na00313a1.pdf]

## Supporting Information

### Ultrafast photoresponse of vertically oriented TMD films probed in a vertical electrode configuration on Si chips

*Topias Järvinen\**, *Seyed-Hossein Hosseini Shokouh\**, *Sami Sainio*, *Olli Pitkänen*, *Krisztian Kordas*

**Table S1.** Collected element stoichiometry from EDX analysis on the MoS<sub>2</sub> and WS<sub>2</sub> films.

| Element          | O    | Si  | S    | W    | Mo   | M:S ratio |
|------------------|------|-----|------|------|------|-----------|
| MoS <sub>2</sub> | 5.7  | 1.4 | 60.9 | -    | 31.1 | 1:1.93    |
| WS <sub>2</sub>  | 69.9 | 1.9 | 5.5  | 22.2 | -    | 1:0.25    |

**Table S2.** XPS peak assignment.

| Sample           | Peak  | Binding energy (eV) | Assignment                    |
|------------------|-------|---------------------|-------------------------------|
| MoS <sub>2</sub> | C 1s  | 284.7               | C–C                           |
|                  |       | 286.0               | C–O                           |
|                  |       | 288.9               | C=O                           |
|                  | O 1s  | 530.6               | Mo–O                          |
|                  |       | 531.4               | C=O                           |
|                  |       | 532.4               | –OH                           |
|                  | S 2p  | 162.0               | Mo–S                          |
|                  |       | 163.3               | Mo–S                          |
|                  |       | 168.5               | SO <sub>3</sub> <sup>2-</sup> |
|                  |       | 169.6               | SO <sub>4</sub> <sup>2-</sup> |
|                  | Mo 3d | 229.4               | Mo–S                          |
|                  |       | 230.9/234.2         | Mo <sup>4+</sup>              |
|                  |       | 231.7/235.0         | Mo <sup>5+</sup>              |
| 232.9/236.1      |       | Mo <sup>6+</sup>    |                               |
| WS <sub>2</sub>  | C 1s  | 284.7               | C–C                           |
|                  |       | 286.3               | C–O                           |
|                  |       | 289.0               | C=O                           |
|                  | O 1s  | 530.7               | W–O                           |
|                  |       | 531.6               | C=O                           |
|                  |       | 532.4               | –OH                           |
|                  | S 2p  | 162.7               | W–S                           |
|                  |       | 168.7               | SO <sub>3</sub> <sup>2-</sup> |
|                  |       | 169.8               | SO <sub>4</sub> <sup>2-</sup> |
|                  | W 4f  | 31.0/34.6           | W–S                           |
|                  |       | 36.0/38.1           | W–O                           |

### AEY and TEY analysis

**Figure S1** A and B show the AEY and TEY spectra of C1s edge for WS<sub>2</sub> sample. On the TEY spectra, the peaks at 285.3 and 288.65 eV are assigned to the transitions of C 1s electrons to the p\* molecular orbital of C=C in the sp<sup>2</sup> network and C=O in the carboxyl groups (COOH), respectively.<sup>1,2</sup> The σ\* region is typically characterized by features ranging from 291 eV for single bonds carbon to 310 eV for triple bonds.<sup>3,4</sup> Thus, the peak at 294.25 eV matches the σ\* excitation of C-O bonding apparently in the acrylic acid configuration.<sup>5</sup> And the broad peak at 301.86 eV can originate from the sigma features of C=O and C=C in the carboxyl and acrylic acid, respectively.<sup>1,5</sup> The sharp peak at 308.26 eV in the AEY spectra, in contrast to the relatively broad features of the σ region, is likely arising from Si2p 3rd order which is visible only in the WS<sub>2</sub> sample as some Si is exposed through the film.<sup>1</sup>

For the MoS<sub>2</sub>, the spectra follow the same trend, Fig. S1 C and D. At 285.3 and 288.65 eV, the absorption edges correspond to the transitions of C1s electrons to the p\* C=C molecular orbital in sp<sup>2</sup> bonding and C=O molecular orbital in carboxyl groups, respectively.<sup>1,2</sup> The peak at 293.35 eV can be assigned to σ\* excitation for carbon single bonded to oxygen (C-O), probably in Methyl formate configuration (~ 293.7 eV),<sup>5</sup> while the peak at 297.35 eV corresponds to σ\* resonance of single-bonded carbon and oxygen either in C-OH or C-O-C configuration.<sup>2</sup> And the peak at 299.95 eV is very close to the σ\*(C=C) resonance in propenol that is around 300 eV.<sup>2,5</sup>

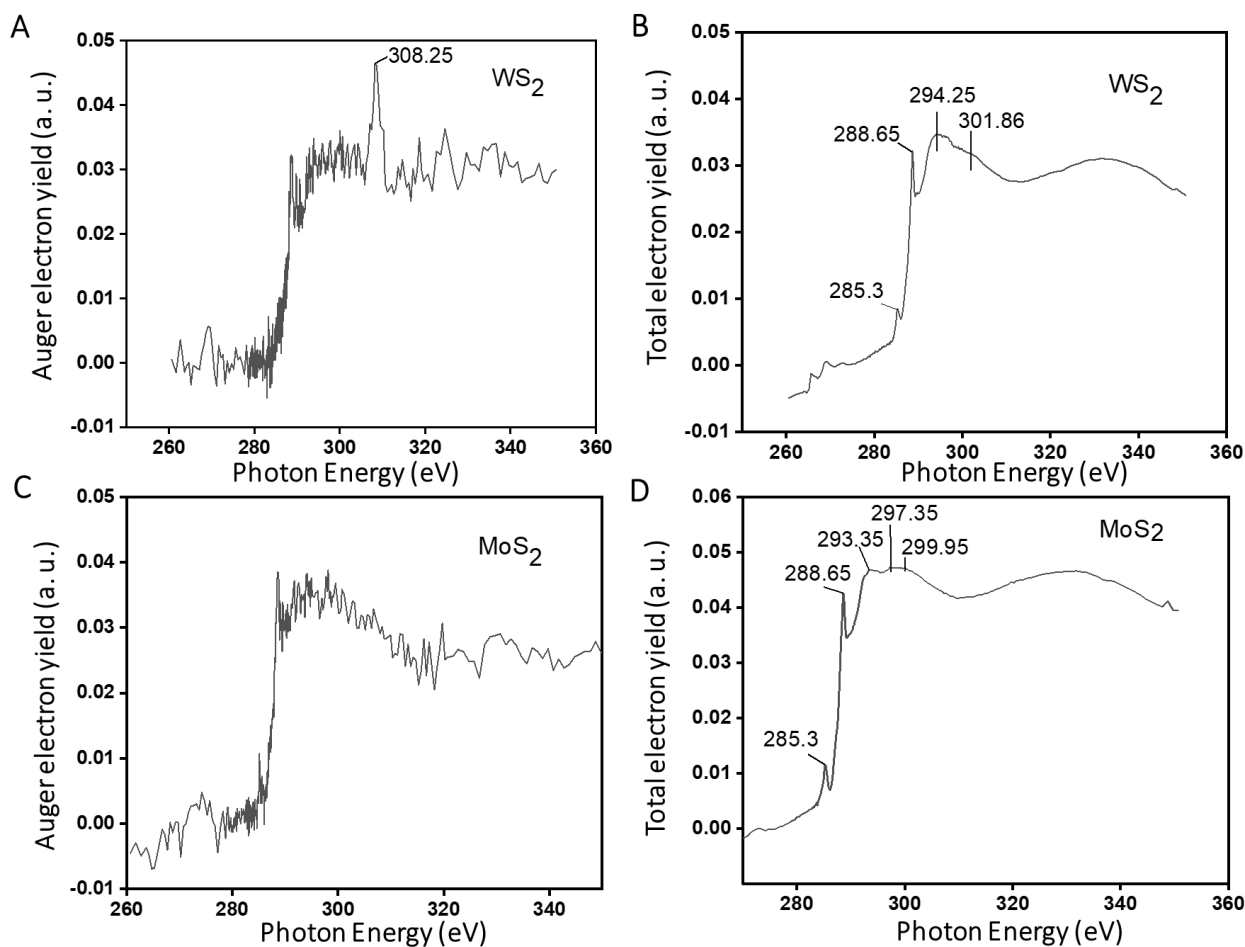

**Figure S1.** C 1s edge absorption spectra for WS<sub>2</sub> in (A) AEY and (B) TEY mode and for MoS<sub>2</sub> in (C) AEY and (D) TEY mode.

The O K edge absorption spectra contain features of oxygen-carbon bonding as a surface contaminant; however, in contrast to the carbon, the spectra show metal-oxygen bonding as well, **Figure S2**. For the WS<sub>2</sub> sample, the pre-edge at 530.25 eV represents the  $t_{2g}$  band formed by W 5d and O 2p orbitals, Fig. S2 A and B, while the shoulder at 531.6 eV is related to the anisotropy of this band.<sup>2,6,7</sup> It is worth mentioning that the  $\pi^*$  resonances from double-bonded oxygen to carbon (carbonyl, C=O) are also expected around 530.8 and 531.8 eV.<sup>2</sup> The  $e_g$  peak (formed by W 5d and O 2p hybridization) cannot be well resolved here due to the overlap of the wide feature at 536.75 eV. The relatively lower intensity of  $t_{2g}$  peak compared to  $e_g$ , in contrast to previous studies, might be attributed to the modification of the chemical environment of W–O bonding (e.g., the W reduction in WO<sub>3</sub> to the W<sub>3</sub>O phase transition as reported in our previous study<sup>3,7,8</sup>) or the association of the broad peak at 536.75 eV.

The relatively wide feature at 542.04 eV corresponds to the W 6sp and O 2p hybridization, leading to energy separation of  $D(E_{sp} - E_{d1})$  around 11.79 eV that is in good agreement with the previous

reports.<sup>3,9</sup> Finally, with the peak at 564.65 eV, corresponding to the scattering resonances at the nearest atoms, the TEY spectrum resembles that of the  $\alpha$ - $\text{WO}_3$  spectra reported in the literature.<sup>3,6</sup> The O K edge absorption for the  $\text{MoS}_2$  sample follows the same analogy, Figure S2 C and D, resembling the  $\alpha$ - $\text{MoO}_3$  spectra.<sup>3,9</sup> The peaks at 529.75 eV and 531.9 eV correspond to the  $t_{2g}$  band formed by Mo 4d and O 2p hybridization.<sup>6</sup> While the wide feature at 537.15 is probably overlap of peaks resulting from the  $e_g$  orbital, and  $s^*$  resonance of single-bonded oxygen in either C-O-C or C-O-H configurations.<sup>2,3,6</sup> The peaks at 542.85 and 562.75 eV, same as the  $\text{WS}_2$  sample, correspond to the Mo 5sp and O 2p hybridization and the scattering resonances at the nearest atoms, respectively.<sup>6</sup>

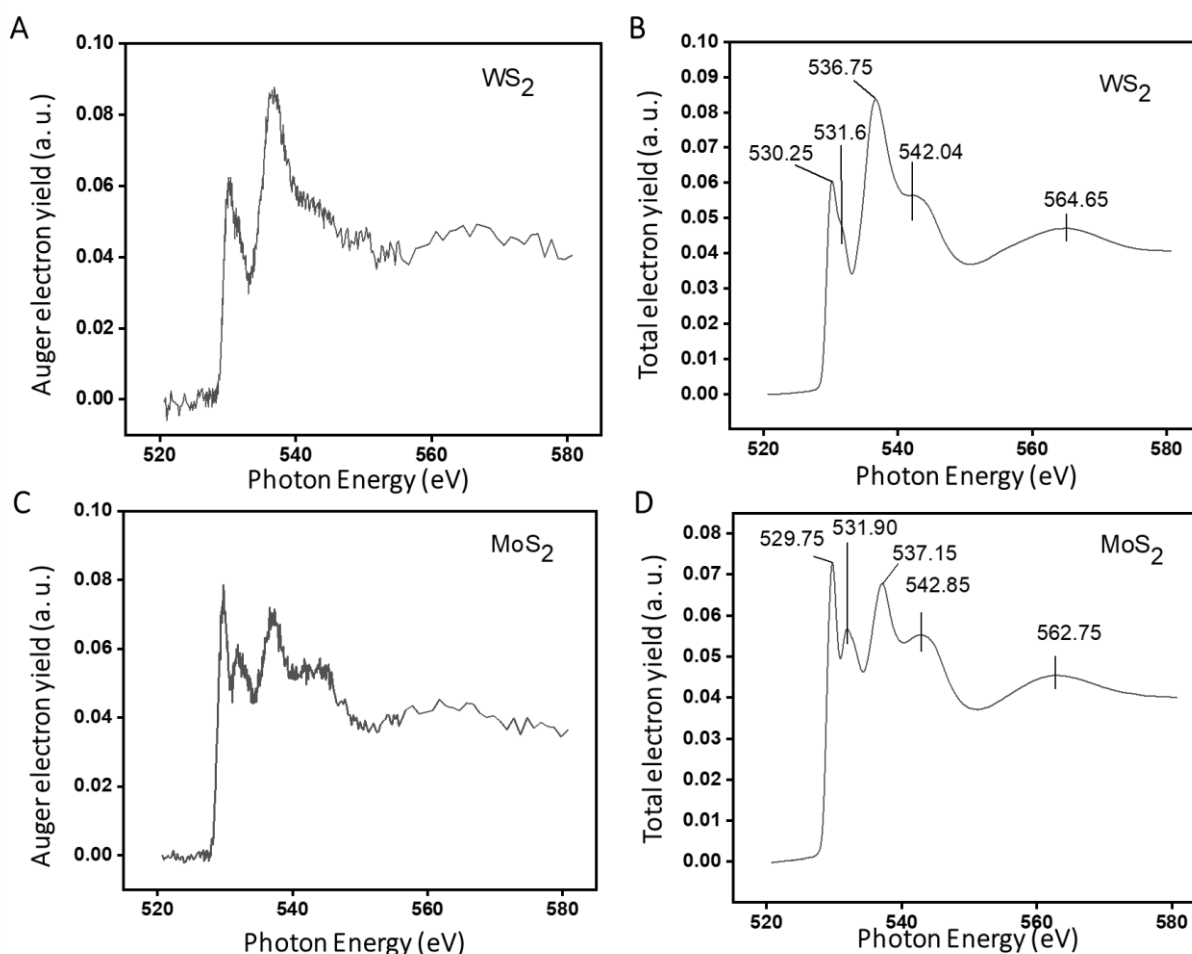

**Figure S2.** O 1s edge absorption spectra for  $\text{WS}_2$  in (A) AEY and (B) TEY mode and for  $\text{MoS}_2$  in (C) AEY and (D) TEY mode.

Finally, the molybdenum oxidation state was calculated, via a linear relationship, from the energy positions of Mo M-edge features. The polarization-dependent spectra of Mo  $M_{2,3}$  were collected with a grazing incidence angle of  $20^\circ$ ,  $55^\circ$ , and  $90^\circ$ , **Figure S3**. For the AEY spectra, limited to a depth profile of 1 nm, the peaks originating from the N atom, appearing in the same spectral range,

are probably dominant, while for TEY spectra, with a depth profile of 10 nm, the Mo  $M_{2,3}$  absorption edges are prominent.

The Mo  $M_3$  edge absorption, at 398.5 and 400.5 eV<sup>3</sup>, implies the partial oxidation of the MoS<sub>2</sub> surface with the oxidation state of +6 (instead of +4) for Mo.<sup>10</sup>

The other peaks at 415.5 and 418.1 eV are ascribed to the Mo  $M_2$  edge, while the broad and polarization-dependent peak at 406.9 eV can be assigned to the N K edge absorption.<sup>11,12</sup>

For clarity and comparison, the peak assignments are summarized in **Table S3** and **S4**.

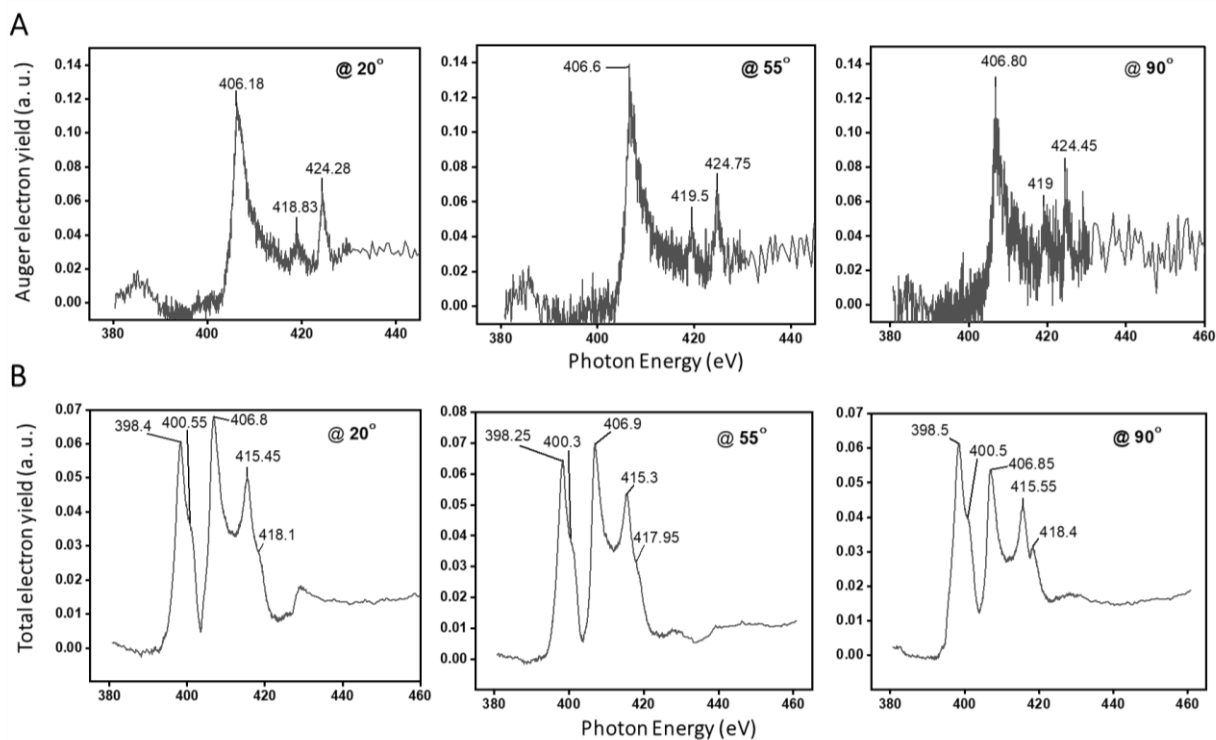

**Figure S3.** (A) AEY and (B) TEY spectra of Mo  $M_{2,3}$  edge absorption at incidence angle of 20°, 55°, and 90°.

**Table S3.** C 1s and O 1s peak assignment at incidence angle of 55° for MoS<sub>2</sub> and WS<sub>2</sub> samples.

| Sample           | Peak | Spectra | Photon energy (eV) | Assignment (transition)                                                     | Ref.  |
|------------------|------|---------|--------------------|-----------------------------------------------------------------------------|-------|
| WS <sub>2</sub>  | C 1s | TEY     | 285.3              | $\pi^*$ (C=C)                                                               | 1,2   |
|                  |      | TEY     | 288.65             | $\pi^*$ (C=O) resonances in carboxyl groups (COOH)                          | 1,2   |
|                  |      | TEY     | 294.25             | $\sigma^*$ (C-O)                                                            | 5     |
|                  |      | TEY     | 301.86             | $\sigma^*$ (C=C or C=O)                                                     | 1,5   |
|                  |      | AEY     | 308.26             | Si 2p                                                                       | 1     |
|                  | O 1s | TEY     | 530.25             | $t_{2g}$ (hybridized orbitals of W 5d + O 2p)                               | 2,6,7 |
|                  |      | TEY     | 531.6              | $t_{2g}$ (hybridized orbitals of W 5d + O 2p)                               | 2,6,7 |
|                  |      | TEY     | 536.75             | $e_g$ (hybridized orbitals of W 5d + O 2p) or $\sigma^*$ (C-OH / C-O-C)     | 2,3   |
|                  |      | TEY     | 542.04             | Hybridized orbitals of (W 6sp+ O 2p)                                        | 3,9   |
|                  |      | TEY     | 564.65             | Scattering resonances at the nearest atoms                                  | 3,6   |
| MoS <sub>2</sub> | C 1s | TEY     | 285.25             | $\pi^*$ (C=C)                                                               | 1,2   |
|                  |      | TEY     | 288.65             | $\pi^*$ (C=O) resonances in carboxyl groups (COOH)                          | 1,2   |
|                  |      | TEY     | 293.35             | $\sigma^*$ (C-O)                                                            | 5     |
|                  |      | TEY     | 297.35             | $\sigma^*$ resonance attributed to single-bonded oxygen e.g., C-OH or C-O-C | 2     |
|                  |      | TEY     | 299.95             | $\sigma^*$ (C=C)                                                            | 2,5   |
|                  | O 1s | TEY     | 529.75             | $t_{2g}$ (hybridized orbitals of Mo 4d + O 2p)                              | 6     |
|                  |      | TEY     | 531.9              | $t_{2g}$ (hybridized orbitals of Mo 4d + O 2p)                              | 6     |
|                  |      | TEY     | 537.15             | $e_g$ (hybridized orbitals of Mo 4d + O 2p) or $\sigma^*$ (C-OH / C-O-C)    | 2,6   |
|                  |      | TEY     | 542.85             | Hybridized orbitals of (Mo 5sp+ O 2p)                                       | 3,9   |
|                  |      | TEY     | 562.75             | Scattering resonances at the nearest atoms                                  | 6     |

**Table S4.** Mo M<sub>III</sub> and M<sub>II</sub> edge absorption at incidence angle of 20°, 55°, and 90°.

| Photon energy (eV) |        |        | Assignment<br>(transition)          | Ref.  |
|--------------------|--------|--------|-------------------------------------|-------|
| 20°                | 55°    | 90°    |                                     |       |
| 398.4              | 398.25 | 398.5  | M <sub>III</sub> (t <sub>2g</sub> ) | 3,10  |
| 400.55             | 400.3  | 400.5  | M <sub>III</sub> (e <sub>g</sub> )  | 3     |
| 406.8              | 406.9  | 406.85 | N-O/H/Si                            | 11,12 |
| 415.45             | 415.3  | 415.55 | M <sub>II</sub> (t <sub>2g</sub> )  | 3     |
| 418.1              | 417.95 | 418.4  | M <sub>II</sub> (e <sub>g</sub> )   | 3     |

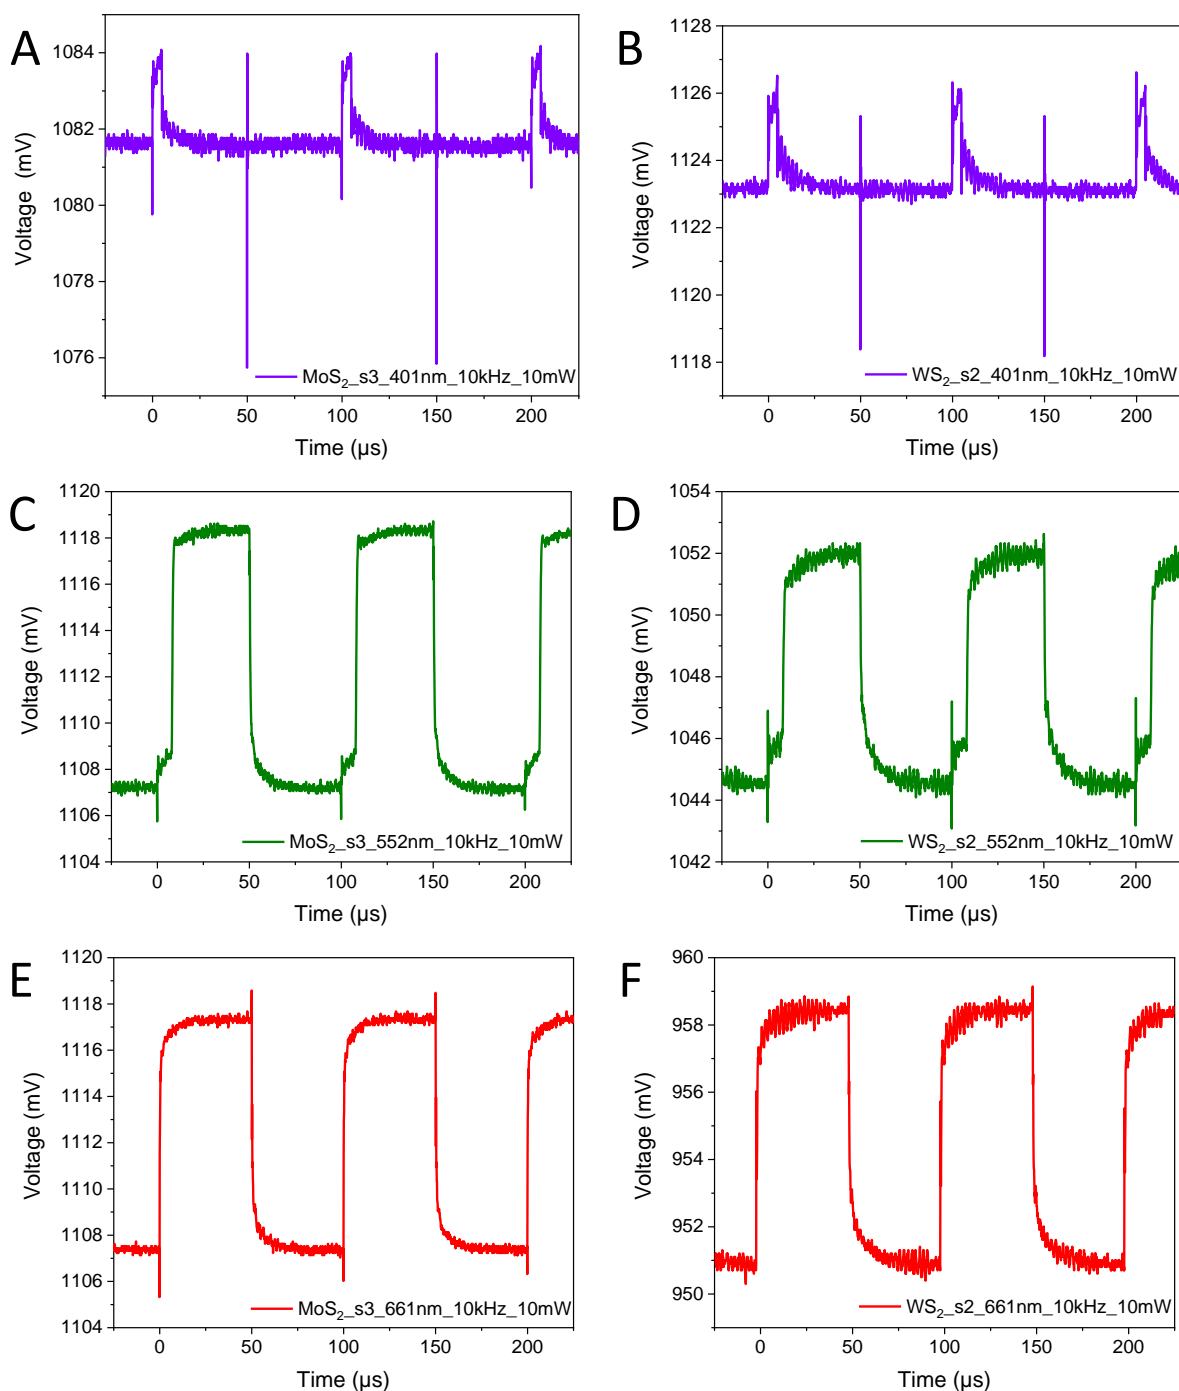

**Figure S4.** Example of raw waveforms used in photoresponse statistics calculations. Note that the 405 nm was pulsed at 5% duty cycle (A for MoS<sub>2</sub>, B for WS<sub>2</sub>) whereas 552 nm and 661nm were pulsed at 50 % duty cycle. In case of 552 nm pulses a slight delay in full laser power delivery can be seen in the rising edge.



**Table S5.** Collected response times with both 10-90% and double exponential fittings from 50-point averaged 1 MHz signals at 661 nm.

| <b>Sample</b>          | <b>Rise time 10-90% (ns)</b> | <b>Decay time 90-10 % (ns)</b> | <b>Rise time with double exponential fitting <math>t_1 / t_2</math> (ns)</b> | <b>Decay time with double exponential fitting <math>t_1 / t_2</math> (ns)</b> |
|------------------------|------------------------------|--------------------------------|------------------------------------------------------------------------------|-------------------------------------------------------------------------------|
| <b>MoS<sub>2</sub></b> | 250                          | 370                            | 11 / 86                                                                      | 49 / 113                                                                      |
| <b>WS<sub>2</sub></b>  | 330                          | 400                            | 78 / 80                                                                      | 115 / 115                                                                     |

## References

- (1) Sainio, S.; Wester, N.; Aarva, A.; Titus, C. J.; Nordlund, D.; Kauppinen, E. I.; Leppänen, E.; Palomäki, T.; Koehne, J. E.; Pitkänen, O.; Kordas, K.; Kim, M.; Lipsanen, H.; Mozetič, M.; Caro, M. A.; Meyyappan, M.; Koskinen, J.; Laurila, T. Trends in Carbon, Oxygen, and Nitrogen Core in the X-Ray Absorption Spectroscopy of Carbon Nanomaterials: A Guide for the Perplexed. *J. Phys. Chem. C* **2021**, *125* (1), 973–988. <https://doi.org/10.1021/acs.jpcc.0c08597>.
- (2) Gandhiraman, R. P.; Nordlund, D.; Javier, C.; Koehne, J. E.; Chen, B.; Meyyappan, M. X-Ray Absorption Study of Graphene Oxide and Transition Metal Oxide Nanocomposites. *J. Phys. Chem. C* **2014**, *118* (32), 18706–18712. <https://doi.org/10.1021/jp503941t>.
- (3) J. G. Chen. NEXAFS Investigations of Transition Metal Oxides, Nitrides, Carbides, Sulfides and Other Interstitial Compounds. *Surf. Sci. Rep.* **1997**, *30* (1), 1–152. [https://doi.org/10.1016/S0167-5729\(97\)00011-3](https://doi.org/10.1016/S0167-5729(97)00011-3).
- (4) Stöhr, J. *NEXAFS Spectroscopy*; Springer Series in Surface Sciences; Springer-Verlag: Berlin Heidelberg, 1992. <https://doi.org/10.1007/978-3-662-02853-7>.
- (5) Ishii, I.; Hitchcock, A. P. The Oscillator Strengths for C1s and O1s Excitation of Some Saturated and Unsaturated Organic Alcohols, Acids and Esters. *J. Electron Spectrosc. Relat. Phenom.* **1988**, *46* (1), 55–84. [https://doi.org/10.1016/0368-2048\(88\)80005-7](https://doi.org/10.1016/0368-2048(88)80005-7).
- (6) Purans, J.; Kuzmin, A.; Parent, Ph.; Laffon, C. X-Ray Absorption Study of the Electronic Structure of Tungsten and Molybdenum Oxides on the O K-Edge. *Electrochimica Acta* **2001**, *46* (13), 1973–1976. [https://doi.org/10.1016/S0013-4686\(01\)00370-X](https://doi.org/10.1016/S0013-4686(01)00370-X).
- (7) Hu, A.; Jiang, Z.; Kuai, C.; McGuigan, S.; Nordlund, D.; Liu, Y.; Lin, F. Uncovering Phase Transformation, Morphological Evolution, and Nanoscale Color Heterogeneity in Tungsten Oxide Electrochromic Materials. *J. Mater. Chem. A* **2020**, *8* (38), 20000–20010. <https://doi.org/10.1039/D0TA06612E>.
- (8) Järvinen, T.; Lorite, G. S.; Peräntie, J.; Toth, G.; Saarakkala, S.; Virtanen, V. K.; Kordas, K. WS<sub>2</sub> and MoS<sub>2</sub> Thin Film Gas Sensors with High Response to NH<sub>3</sub> in Air at Low Temperature. *Nanotechnology* **2019**, *30* (40), 405501. <https://doi.org/10.1088/1361-6528/ab2d48>.
- (9) de Groot, F. M. F.; Grioni, M.; Fuggle, J. C.; Ghijsen, J.; Sawatzky, G. A.; Petersen, H. Oxygen 1s X-Ray-Absorption Edges of Transition-Metal Oxides. *Phys. Rev. B* **1989**, *40* (8), 5715–5723. <https://doi.org/10.1103/PhysRevB.40.5715>.
- (10) Chaturvedi, S.; Rodriguez, J. A.; Brito, J. L. Characterization of Pure and Sulfided NiMoO<sub>4</sub> Catalysts Using Synchrotron-Based X-Ray Absorption Spectroscopy (XAS) and Temperature-Programmed Reduction (TPR). *Catal. Lett.* **1998**, *51* (1), 85–93. <https://doi.org/10.1023/A:1019089002041>.
- (11) Chung, Y.; Lee, J. C.; Shin, H. J. Direct Observation of Interstitial Molecular N<sub>2</sub> in Si Oxynitrides. *Appl. Phys. Lett.* **2005**, *86* (2), 022901. <https://doi.org/10.1063/1.1851620>.
- (12) Ohkubo, M.; Shiki, S.; Ukibe, M.; Matsubayashi, N.; Kitajima, Y.; Nagamachi, S. X-Ray Absorption near Edge Spectroscopy with a Superconducting Detector for Nitrogen Dopants in SiC. *Sci. Rep.* **2012**, *2* (1), 831. <https://doi.org/10.1038/srep00831>.
